# Supplementary material
Source: PubMed Central journal article supplement (PMC8135112)
Supplement: NIHMS1687818-supplement-supinfo.pdf [file NIHMS1687818-supplement-supinfo.pdf]

## Supplementary Information

### *P-glycoprotein Inhibition Exacerbates Paclitaxel Neurotoxicity in Neurons and Cancer Patients*

Stage et al. 2020

**Figure S1.** Eighteen day differentiation of SH-SY5Y cells generates cells with a complex neuronal network. Scale bar represents 200  $\mu\text{m}$ .

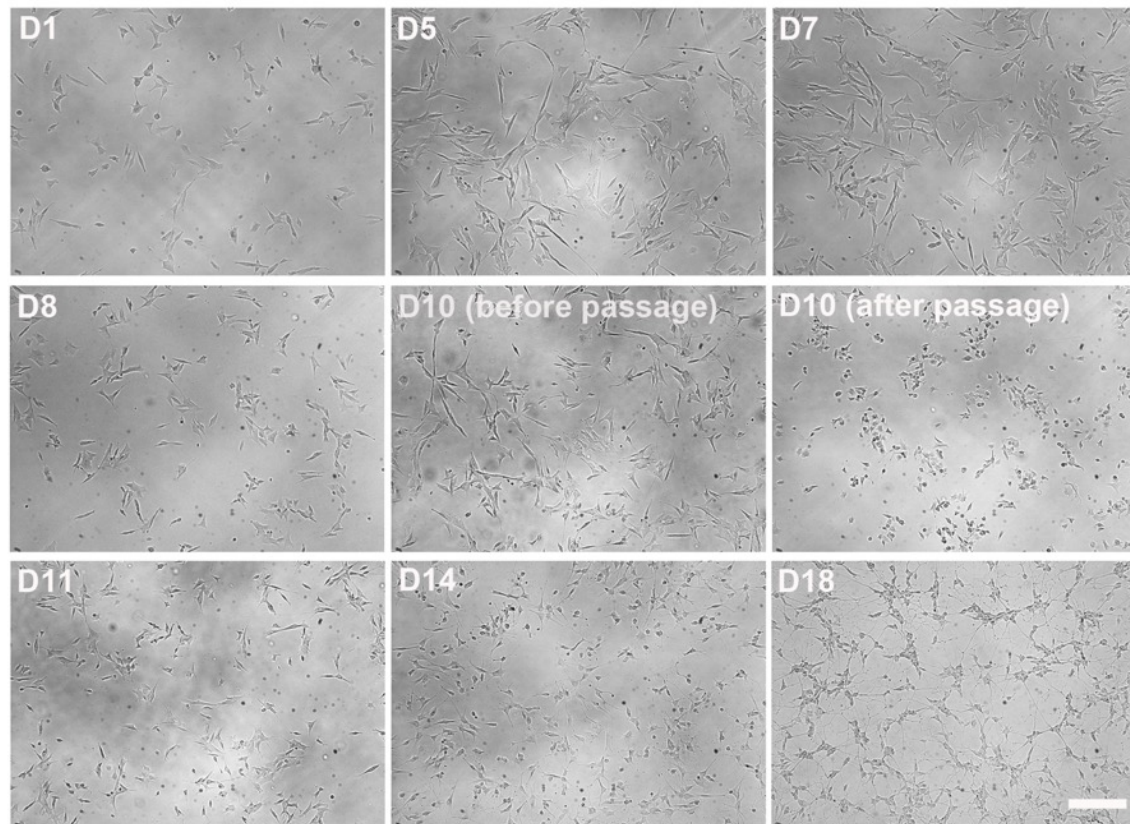

**Figure S2.** Immunolabelling of Ki67 before and after 18 days of differentiation of SH-SY5Y cells shows that a low proportion of cells proliferate, highlighting their post-mitotic state.

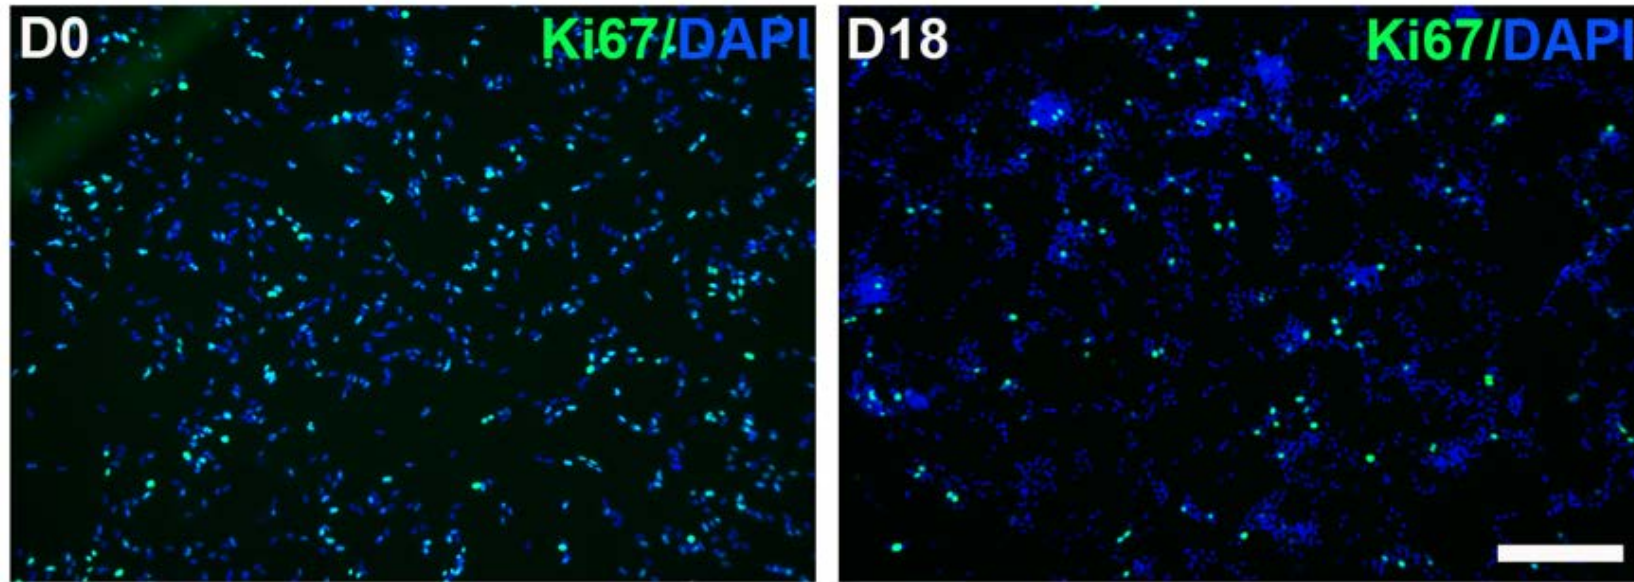

**Supplementary Figure 3.** Simvastatin exacerbated neurotoxicity only at a higher concentration of paclitaxel. Fully differentiated SH-SY5Y cells were treated with the indicated concentrations of paclitaxel for 24 hr in the absence and presence of simvastatin (0.005 or 0.05  $\mu\text{M}$ ) and stained for  $\beta$ -tubulin and nuclei. The number of neurites were quantified using ImageJ. At least five images from three separate differentiations were assessed. Simvastatin caused a significant exacerbation of neurotoxicity only at 0.5  $\mu\text{M}$  paclitaxel ( $p = 0.002$ ).

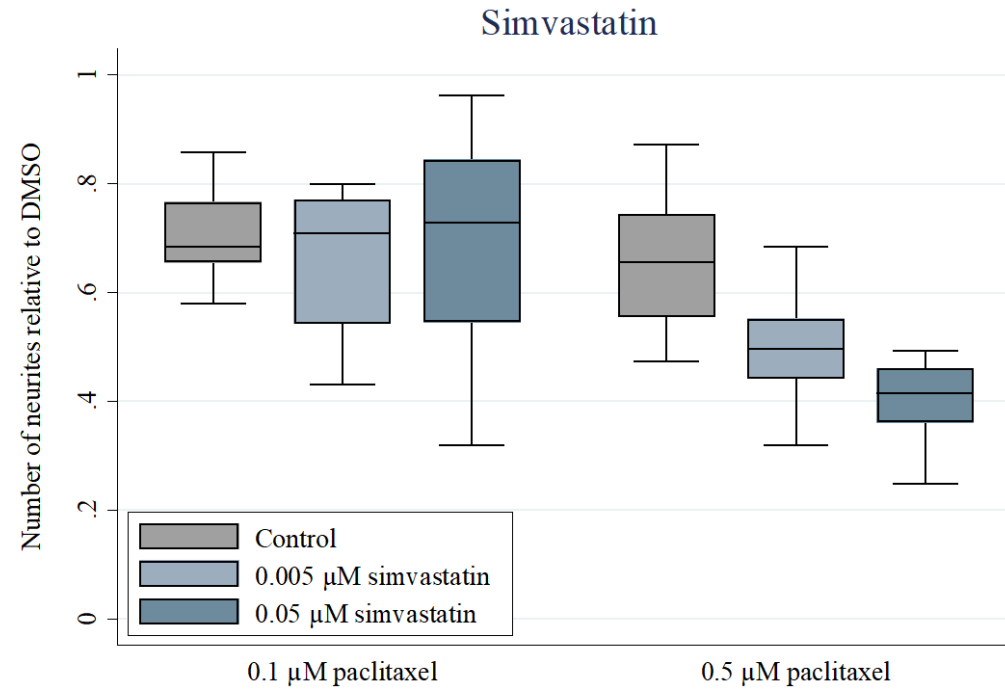

**Supplementary Figure 4.** Atorvastatin treatment alone did not cause neurotoxicity in SH-SY5Y cells. Fully differentiated SH-SY5Y cells were treated with the indicated concentrations of atorvastatin for 24 hr and stained for  $\beta$ -tubulin and nuclei. The number of neurites were quantified using ImageJ. At least five images from three separate differentiations were assessed.

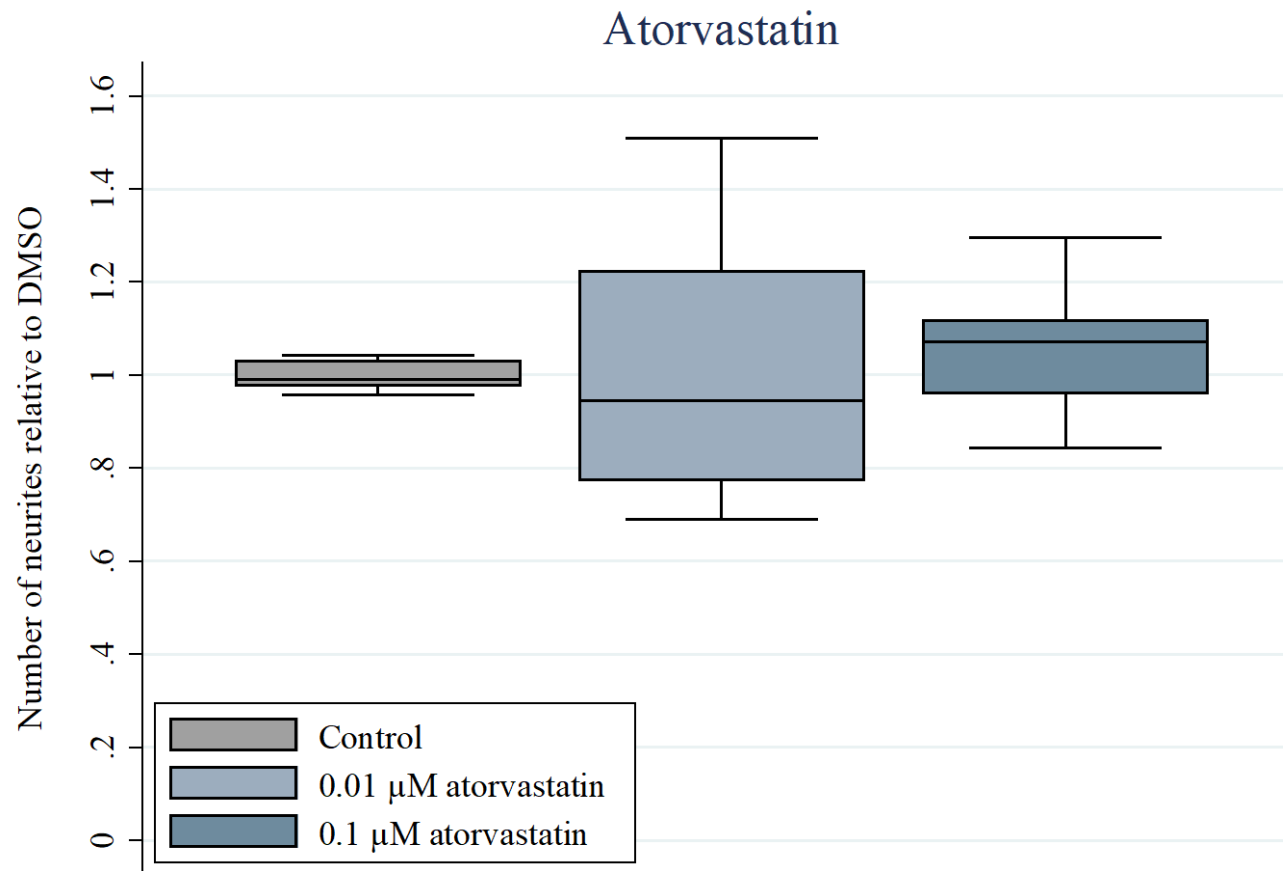

**Supplementary Figure 5.** Simvastatin treatment alone did not cause neurotoxicity in SH-SY5Y cells. Fully differentiated SH-SY5Y cells were treated with the indicated concentrations of simvastatin for 24 hr and stained for  $\beta$ -tubulin and nuclei. The number of neurites were quantified using ImageJ. At least five images from three separate differentiations were assessed.

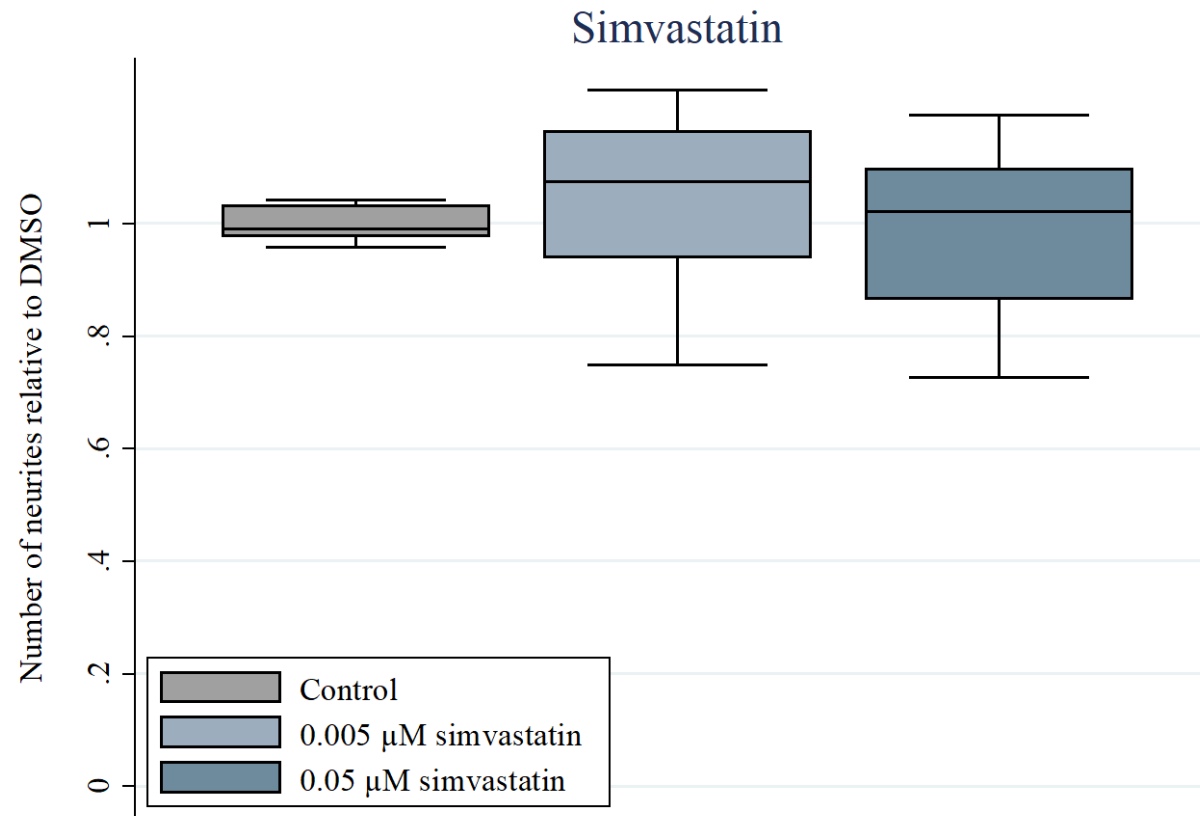

**Table S1.** Multivariate analyses of dose modification due to peripheral neuropathy.

| Features                               | Any P-gp inhibitor |        | Strong P-gp inhibitor |        | Atorvastatin      |         | Simvastatin       |        |
|----------------------------------------|--------------------|--------|-----------------------|--------|-------------------|---------|-------------------|--------|
|                                        | OR (95% CI)        | P      | OR (95% CI)           | P      | OR (95% CI)       | P       | OR (95% CI)       | P      |
| <b>P-gp inhibitor</b>                  | 2.36 (1.31, 4.25)  | 0.0043 | 4.73 (1.88, 11.9)     | 0.0010 | 7.01 (2.28, 21.5) | 0.00067 | 0.33 (0.0, 1.19)  | 0.091  |
| <b>Tumor type</b>                      | 1.24 (0.39, 3.90)  | 0.71   | 1.11 (0.35, 3.47)     | 0.86   | 1.03 (0.33, 3.20) | 0.96    | 1.26 (0.41, 3.86) | 0.69   |
| <b>Stage</b>                           | 0.55 (0.28, 1.09)  | 0.084  | 0.52 (0.26, 1.06)     | 0.073  | 0.54 (0.27, 1.10) | 0.092   | 0.63 (0.32, 1.23) | 0.177  |
| <b>Age</b>                             | 1.03 (1.00, 1.06)  | 0.031  | 1.04 (1.01, 1.06)     | 0.013  | 1.03 (1.01, 1.06) | 0.015   | 1.05 (1.02, 1.08) | 0.0004 |
| <b>Paclitaxel, FEC/AC schedule</b>     | 0.21 (0.06, 0.71)  | 0.012  | 0.22 (0.06, 0.76)     | 0.017  | 0.23 (0.07, 0.79) | 0.020   | 0.24 (0.07, 0.82) | 0.022  |
| <b>Paclitaxel/carboplatin schedule</b> | 0.87 (0.29, 2.56)  | 0.80   | 0.97 (0.33, 2.85)     | 0.96   | 0.99 (0.34, 2.85) | 0.98    | 0.89 (0.31, 2.59) | 0.84   |
| <b>Previous chemotherapy</b>           | 2.08 (0.34, 12.9)  | 0.43   | 1.64 (0.25, 10.8)     | 0.61   | 2.15 (0.35, 13.0) | 0.41    | 1.81 (0.30, 11.1) | 0.52   |
| <b>Body surface area</b>               | 1.83 (0.60, 5.62)  | 0.29   | 1.80 (0.59, 5.49)     | 0.30   | 1.77 (0.58, 5.44) | 0.32    | 1.89 (0.61, 5.82) | 0.27   |

**Table S2.** Proteins analyzed by TXP targeted proteomic analysis

| <b>Protein</b> | <b>UniProt ID</b> | <b>Peptide Sequence</b> |
|----------------|-------------------|-------------------------|
| ABCB1 (P-gp)   | P08183            | NTTGALTTR               |
| ABCC1 (MRP1)   | P33527            | ITIIPQDPVLFSGSLR        |
| ABCC2 (MRP2)   | Q92887            | LTIIPQDPILFSGSLR        |

**Table S3.** List of P-gp inhibitors used to assess the impact of P-gp inhibition on the risk of dose modification of paclitaxel due to sensory neuropathy.

| Group                           | Lund et al. 2017 [31] | Wessler et al. 2013 [32] |
|---------------------------------|-----------------------|--------------------------|
| Anticancer and immunomodulatory | Carbozantinib         |                          |
|                                 | Ciclosporin A         | Cyclosporine             |
|                                 | Darunavir             |                          |
|                                 | Enzalutamide          |                          |
|                                 | Everolimus            |                          |
|                                 | Ibrutinib             |                          |
|                                 | Imatinib              |                          |
|                                 | Lapatinib             |                          |
|                                 | Regorafenib           |                          |
|                                 | Tacrolimus            | Tacrolimus               |
|                                 |                       | Tariquidar               |
|                                 |                       | Valspodar                |
| Cardiovascular drugs            | Amiodarone            | Amiodarone               |
|                                 | Carvedilol            | Carvedilol               |
|                                 | Diltiazem             | Diltiazem                |
|                                 | Dronedarone           | Dronedarone              |
|                                 | Ibresartan            |                          |
|                                 | Lomitapide            |                          |
|                                 | Propafenone           | Propafenone              |
|                                 | Propranolol           | Propranolol              |
|                                 | Quinidine             | Quinidine                |
|                                 | Ranolazine            | Ranolazine               |
|                                 | Simvastatin           |                          |
|                                 | Ticagrelor            | Ticagrelor               |
|                                 | Verapamil             | Verapamil                |
|                                 |                       | Atorvastatin             |



|                     |                |                                                          |
|---------------------|----------------|----------------------------------------------------------|
|                     |                | Captopril                                                |
|                     |                | Felodipine                                               |
|                     |                | Warfarin                                                 |
|                     |                | Dipyridamole                                             |
|                     |                | Losartan                                                 |
|                     |                | Mibefradil                                               |
|                     |                | Nicardipine                                              |
|                     |                | Nifedipine                                               |
|                     |                | Reserpine                                                |
|                     |                | Talinolol                                                |
|                     |                | Telmisartan                                              |
| Infectious diseases | Azithromycin   | Azithromycin                                             |
|                     | Clarithromycin | Clarithromycin                                           |
|                     | Daclastavir    | Erythromycin                                             |
|                     | Itraconazole   | Itraconazole                                             |
|                     | Ivermectin     | Ivermectin                                               |
|                     | Ketoconazole   | Ketoconazole                                             |
|                     | Ledipasvir     |                                                          |
|                     | Lopinavir      |                                                          |
|                     | Mefloquine     | Mefloquine                                               |
|                     | Ponatinib      |                                                          |
|                     | Roxithromycin  |                                                          |
|                     | Saquinavir     |                                                          |
|                     |                | Ofloxacin                                                |
|                     |                | Rifampin (only single dose, multiple dose is an inducer) |
| CNS drugs           | Flupenthixol   |                                                          |
|                     | Fluvoxamine    |                                                          |
|                     | Haloperidol    | Haloperidol                                              |
|                     | Paroxetine     |                                                          |
|                     |                | Amitriptyline                                            |

|                                            |            |                |
|--------------------------------------------|------------|----------------|
|                                            |            | Chlorpromazine |
|                                            |            | Desipramine    |
|                                            |            | Disulfiram     |
|                                            |            | Doxepin        |
|                                            |            | Fluphenazine   |
|                                            |            | Imipramine     |
|                                            |            | Sertraline     |
|                                            |            | Varenicline    |
| GI drugs                                   | Loperamide |                |
|                                            |            | Cimetidine     |
|                                            |            | Omeprazole     |
| Hormones and drugs for endocrine disorders | Eliglustat |                |
| Others                                     | Mirabegron |                |
|                                            | Quinine    |                |
|                                            |            | Conivaptan     |
|                                            |            | Elacridar      |
|                                            |            | Progesterone   |
|                                            |            | Troglitazone   |

Drugs that are highlighted with green are noted as strong/potent inhibitors in the respective references.
